# Supplementary material
Source: publisher figshare collection journal article supplement (https://acs.figshare.com/ndownloader/files/3898156)
Supplement: Supplementary file 1 [file 3898156]

**Supporting Information for**  
**Electrochemical Oxidation and Sensing of Methylamine Gas in Room**  
**Temperature Ionic Liquids**

Krishnan Murugappan, Colin Kang, Debbie S. Silvester\*

Nanochemistry Research Institute, Department of Chemistry, Curtin University, GPO Box U1987,  
Perth, 6845, Australia.

*To be submitted: J. Phys. Chem. C*

---

\* To whom correspondence should be addressed.

Email: D.Silvester-Dean@curtin.edu.au

## Figure legends

Figure S1: CV for the oxidation of 1.3 % methylamine on an a) 8.3  $\mu\text{m}$  radius Pt electrode and b) 10.9  $\mu\text{m}$  radius Au electrode in  $[\text{C}_4\text{mpyr}][\text{NTf}_2] at varying scan rates from 0.01 V/s to 4 V/s$

Figure S2: (-) CV for the oxidation of methylamine gas, (-) the oxidation of methylamine and ammonia gas combined and (-) the oxidation of ammonia gas on a 8.3  $\mu\text{m}$  radius Pt electrode at a scan rate of 0.1 V/s in  $[\text{C}_4\text{mpyr}][\text{NTf}_2]$ . Note the concentrations are not fixed due to the difficulties in mixing the two toxic gases safely. This is purely to show additive behaviour.

Figure S3: Plot of 1.3 % methylamine oxidation currents vs square root of scan rates in the six RTILs, a)  $[\text{C}_2\text{mim}][\text{NTf}_2]$ , b)  $[\text{C}_4\text{mim}][\text{NTf}_2]$ , c)  $[\text{C}_6\text{mim}][\text{FAP}]$ , d)  $[\text{C}_4\text{mpyr}][\text{NTf}_2]$ , e)  $[\text{C}_4\text{mim}][\text{BF}_4]$ , and f)  $[\text{C}_4\text{mim}][\text{PF}_6]$  on a Pt microelectrode (diameter 8.3  $\mu\text{m}$ )

Figure S1

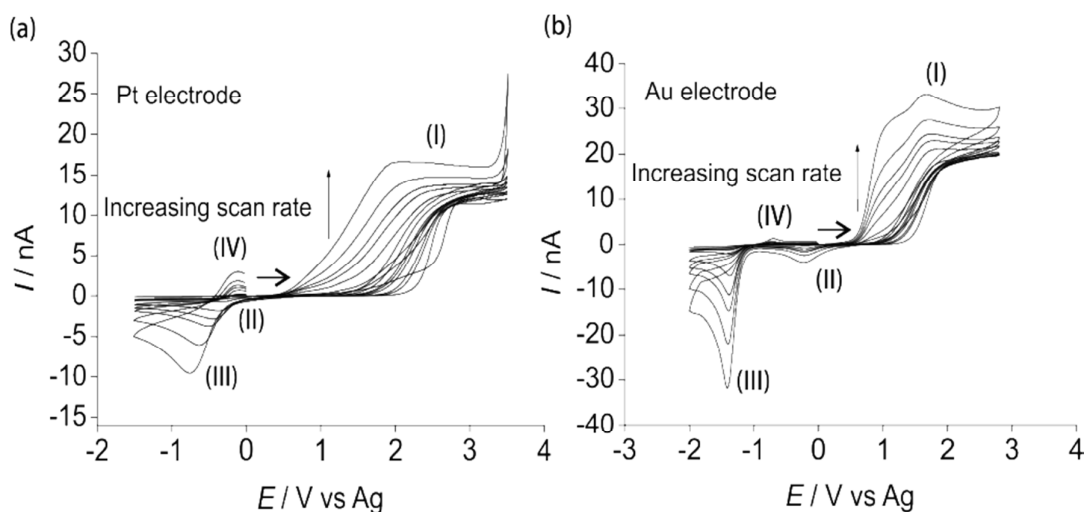

Figure S2

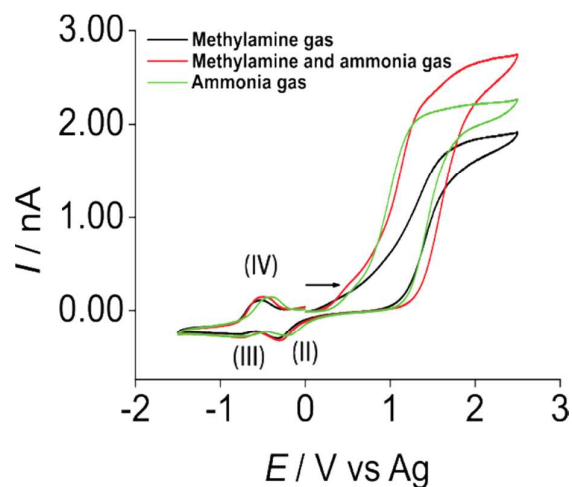

Figure S3

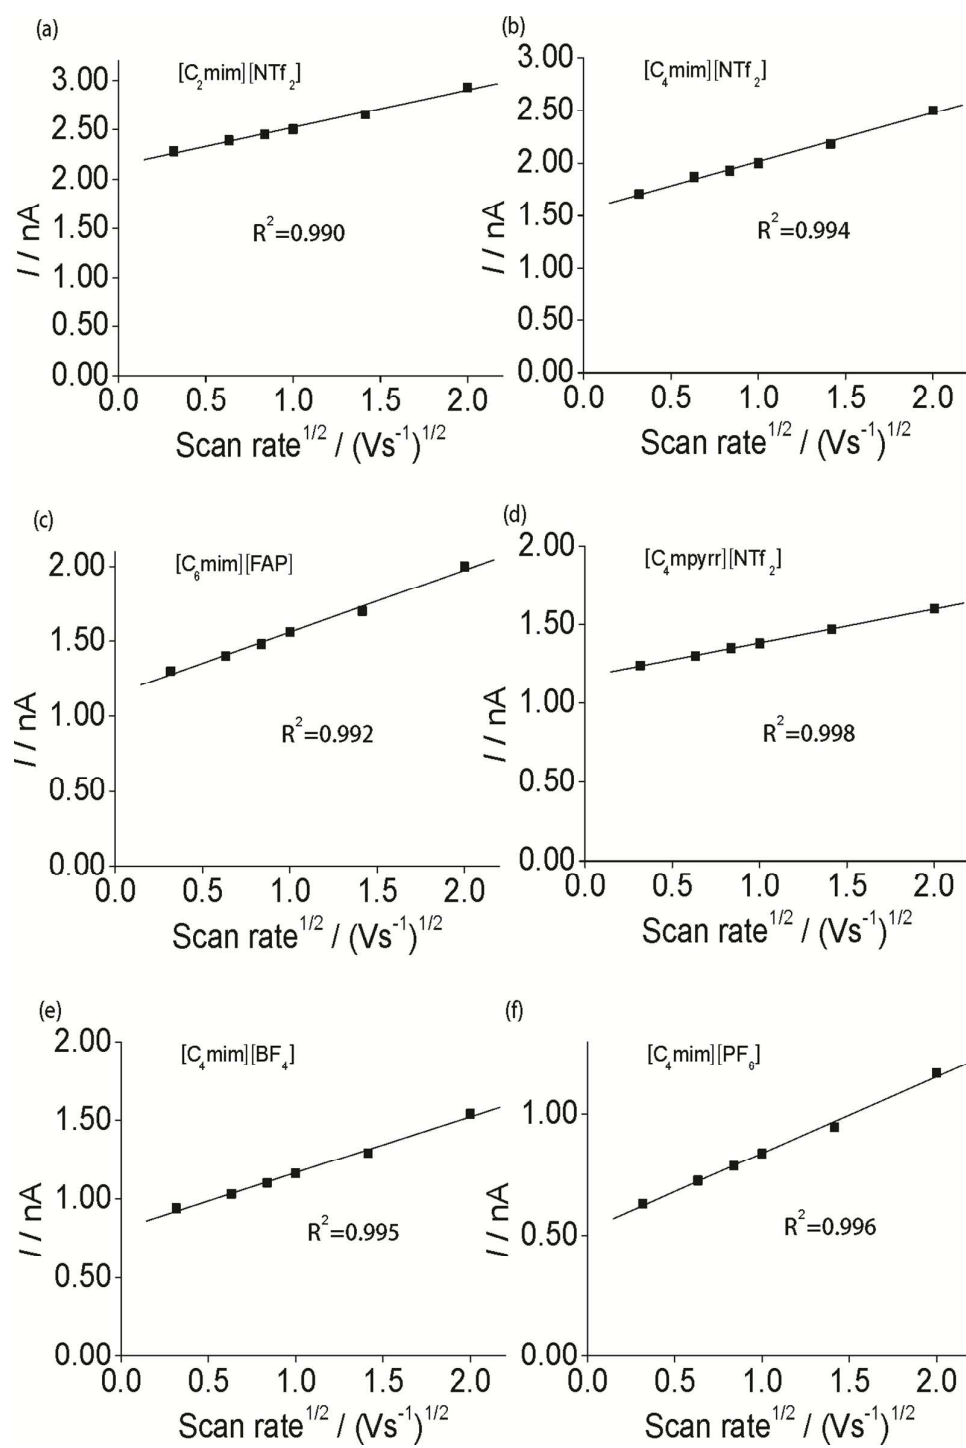

NOTE (Figure S3): Voltammetry at microelectrodes in RTILs is known to give rise to behaviour somewhere in-between pure microelectrode (radial diffusion) and pure macroelectrode (linear diffusion), as discussed in the following review article (Barrosse-Antle et al. Chem. Asian J., 2010, 5, 202-230). For true steady-state behaviour to apply, the following inequality must be met:

$$\nu \ll \frac{RTD}{nFr^2}$$

Where  $\nu$  is the scan rate,  $R$  is the universal gas constant, and  $T$  is the absolute temperature,  $D$  is the diffusion coefficient,  $n$  is the number of electrons,  $F$  is Faraday's constant and  $r$  is the radius of the disk.

In this work, if we take  $r$  to be 8.3  $\mu\text{m}$  and  $D$  to be  $4.5 \times 10^{-10} \text{ m}^2\text{s}^{-1}$  for methylamine/ammonia in  $[\text{C}_2\text{mim}][\text{NTf}_2]$ , the scan rate must be less than  $75 \text{ mVs}^{-1}$  for true steady-state behaviour. Since the range of scan rates employed in this work is  $10\text{-}4,000 \text{ mVs}^{-1}$ , this is in the intermediate range for pure micro- or pure macro-electrode behaviour, and the plots of current vs square root scan rate do not pass through the origin.
